# Supplementary material for: Energy band alignment at the heterointerface between a nanostructured TiO2 layer and Au22(SG)18 clusters: relevance to metal-cluster-sensitized solar cells
Source: Royal Society of Chemistry journal article supplement (doi:10.1039/d0nr06662a), 2020-11-27
Supplement: d0nr06662a1.pdf [file d0nr06662a1.pdf]

## ***Electronic Supplementary Information***

### **Energy band alignment at the heterointerface between a nanostructured TiO<sub>2</sub> layer and Au<sub>22</sub>(SG)<sub>18</sub> clusters:**

#### **Relevance to metal-cluster-sensitized solar cells**

Liudmila L. Larina<sup>a,c,§</sup>, Oleksii Omelianovych<sup>a,§</sup>, Van-Duong Dao<sup>a</sup>, Kyunglim Pyo<sup>b</sup>, Dongil Lee<sup>b</sup>, Ho-Suk Choi<sup>a\*</sup>

<sup>a</sup>*Department of Chemical Engineering and Applied Chemistry, Chungnam National University, Daejeon, 34134, Republic of Korea*

<sup>b</sup>*Department of Chemistry, Yonsei University, Seoul 03722, Republic of Korea*

<sup>c</sup>*Department of Solar Photovoltaics, Institute of Biochemical Physics, Russian Academy of Sciences, Kosygin St. 4, 119334, Moscow, Russia*

#### **Electronic structure of nanostructured TiO<sub>2</sub> film**

*The chemical state of the nanostructured TiO<sub>2</sub> anatase*

Characterization of the TiO<sub>2</sub> substrate was conducted by means of an XPS analysis. The areas of interest are the Ti2p and O1s core-level spectra. First, we clarify the impact of Ar ion etching on the surface chemistry by comparing the Ti2p and O1s spectra before and after the treatment. The aforementioned spectra are shown in Figures S1a and b. Well-separated spin-orbit components Ti2p<sub>1/2</sub>–2p<sub>3/2</sub> with a splitting value of 5.7 eV are observed in the spectra (Figure S1a). The symmetric Ti2p<sub>1/2</sub> and Ti2p<sub>3/2</sub> peaks were centered at the binding energies of 464.7 and 459 eV, respectively. It is important to note that the peak intensity decreases significantly after Ar ion etching, suggesting some chemical changes in the material. These changes in the structure can be understood only after a deconvolution analysis of Ti2p core-level spectra. In the Ti2p spectrum, there are noticeable peaks that appear at low binding energies after an Ar<sup>+</sup> treatment. These peaks can be attributed to the lower oxidation states of Ti<sup>3+</sup> and Ti<sup>2+</sup>. Ar-induced reduction of transition-metal oxides was previously reported and has been widely studied <sup>1-3</sup>. With regard to the O1s spectrum, a minor shift towards a higher binding energy was recorded after etching (Figure S1b). Such changes can be ascribed to the appearance of Ti<sup>3+</sup> as a result of sputter damage <sup>3</sup>.

Peak fitting and deconvolution were conducted for TiO<sub>2</sub> after cleaning in the vicinity of the Ti2p and O1s core-level emissions shown in Figures S1c and d. The analysis indicated the presence of three oxidation states of titanium, which could be assigned to Ti<sup>2+</sup>, Ti<sup>3+</sup> and Ti<sup>4+</sup>. Ti<sup>4+</sup> and Ti<sup>3+</sup> are referred to as the bulk configuration of TiO<sub>2</sub>, while Ti<sup>2+</sup> is rather a product of sputter damage to the film surface<sup>4</sup>. The observed value of the spin-orbital splitting also confirms the existence of the Ti<sup>4+</sup> oxidation state<sup>4</sup>. The chemical state of the TiO<sub>2</sub> substrate was confirmed through an analysis of the O1s core-level spectra. Figure S1d presents the XPS spectra recorded near the O1s core-level emissions. Peak fitting and deconvolution were performed for the O1s core-level emission in the spectrum interval of 534 to 528 eV. The O1s spectrum was decomposed into two components. The fitting parameters are summarized in Table S1. The main compound centered at the binding energy of 530.4 originates from the Ti<sup>4+</sup> oxidation state<sup>5</sup>. The peak at the binding energy of 531.5 eV can be assigned to the lower oxidation states of Ti<sup>3+</sup> and Ti<sup>2+</sup><sup>4</sup>. The analysis results of the O1s core-level spectrum are in line with data pertaining to the Ti2p spectrum.

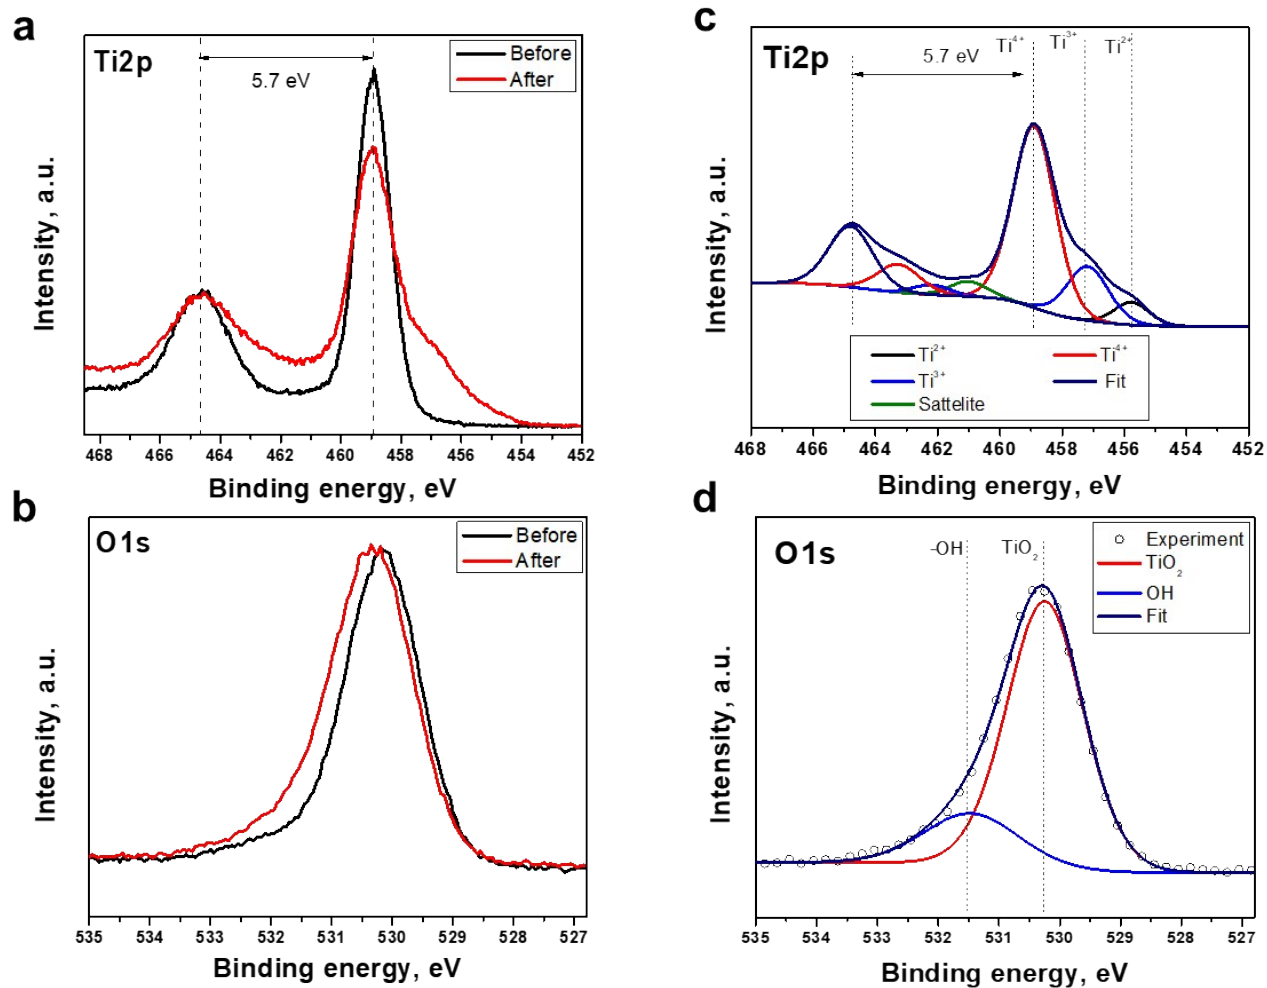

**Figure S1.** Comparison of the XPS spectra in the vicinity of (a) Ti2p and (b) O1s for the bulk TiO<sub>2</sub> sample before and after Ar ion sputtering, and deconvolution results of (c) Ti2p and (d) the O1s spectra for bulk TiO<sub>2</sub>

**Table S1.** Deconvolution parameters obtained by the fitting analysis of TiO<sub>2</sub> after sputtering in the vicinity of the Ti2p and O1s core-level spectra

| Core-level |                  | Binding energy, eV | At%  | FWHM, eV |
|------------|------------------|--------------------|------|----------|
| Ti2p       | Ti <sup>4+</sup> | 458.9              | 72.0 | 1.4      |
|            | Ti <sup>3+</sup> | 457.2              | 20.9 | 1.6      |
|            | Ti <sup>2+</sup> | 455.7              | 7.1  | 1.6      |
| O1s        | Ti <sup>4+</sup> | 530.3              | 83.3 | 1.6      |

|  |     |       |      |     |
|--|-----|-------|------|-----|
|  | -OH | 531.5 | 16.7 | 1.9 |
|--|-----|-------|------|-----|

*Optical analysis: the bandgap of the nanostructured TiO<sub>2</sub> anatase*

Given that a TiO<sub>2</sub> nanoparticle layer is a highly light-scattering material, E<sub>g</sub> of TiO<sub>2</sub> was evaluated by applying the Kubelka–Munk method, which based on the following equation,

$$F(R) = \frac{(1 - R)}{2R},$$

where R is the diffuse reflectance and F(R) is the Kubelka–Munk function, which is proportional to the absorption coefficient ( $\alpha$ )<sup>6</sup>.

For an indirect semiconductor such as TiO<sub>2</sub>, the expected variation of  $hv * F(R)$  with photon energy  $hv$  near the absorption edge can be expressed as follows:

$$hv * F(R) = B(hv - E_g)^2, \quad (1)$$

where  $B$  is the absorption constant for the indirect transition,  $h$  is Plank's constant,  $\nu$  is the frequency, and  $E_g$  is the optical bandgap energy<sup>7</sup>. The plot of  $F(R)$  versus  $hv$  was fitted using relation (1). The analysis result of the diffusion reflectance spectrum in terms of the indirect optical absorption is shown in Figure S2. A plot of  $\sqrt{(hv * F(R))}$  versus the photon energy provides two straight line segments with two intercepts on the energy axis,  $hv_1$  and  $hv_2$ . The  $E_g$  values can be estimated as follows,  $E_g = \frac{1}{2}(hv_1 + hv_2)$ . Thus, the bandgap value of  $\sim 3.2$  eV ( $hv_1 = 3.17$  eV;  $hv_2 = 3.21$  eV) was derived for nanostructured TiO<sub>2</sub> anatase. The obtained value is in good agreement with our results and with previously reported data<sup>4,8</sup>.

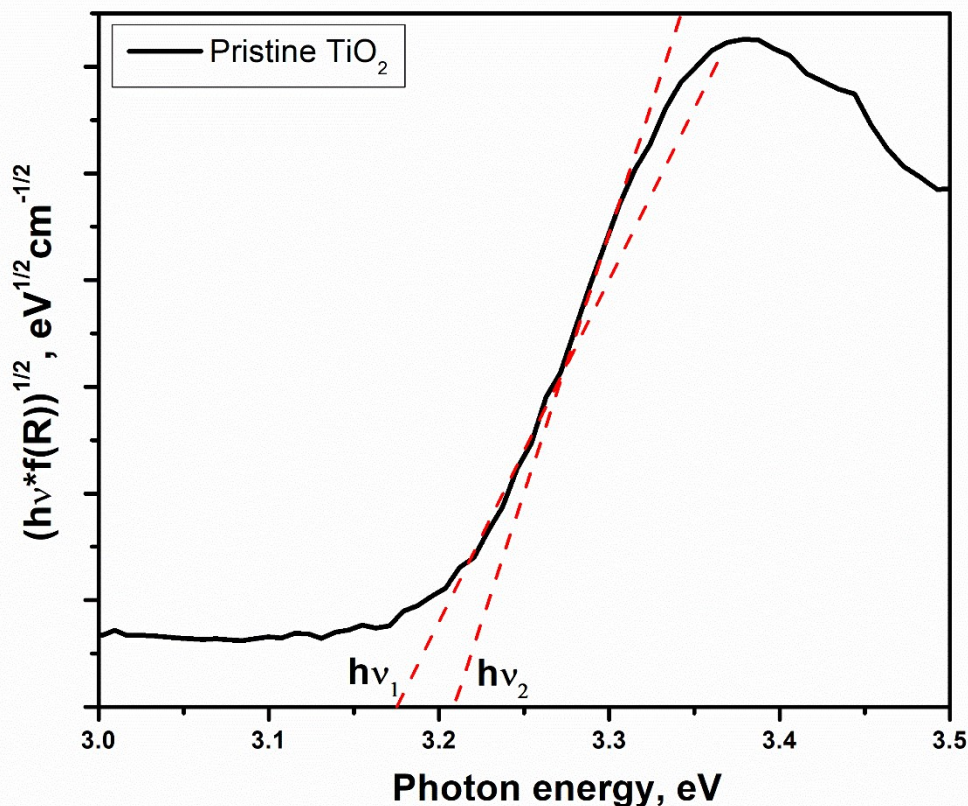

**Figure S2.** Analysis of the diffuse reflectance spectrum of the TiO<sub>2</sub> nanoparticle layer in terms of indirect optical absorption. A plot of  $\sqrt{(hv * F(R))}$  versus the incident photon energy ( $hv$ ) is depicted by the solid line. The plot of the Kubelka–Munk function versus  $hv$  gives two dashed line segments with two intercepts on the energy axis,  $hv_1$  and  $hv_2$ . The  $E_g$  value can be estimated as the center between these two intercepts.

## References

- 1 O. Omelianovych, L. L. Larina, V. D. Dao and H. S. Choi, *Appl. Surf. Sci.*, 2018, **457**, 381–387.
- 2 R. Steinberger, J. Walter, T. Greunz, J. Duchoslav, M. Arndt, S. Molodtsov, D. C. Meyer and D. Stifter, *Corros. Sci.*, 2015, **99**, 66–75.
- 3 X. Zhou, N. Liu and P. Schmuki, *Electrochem. commun.*, 2014, **49**, 60–64.
- 4 G. Liu, W. Jaegermann, J. He, V. Sundström and L. Sun, *J. Phys. Chem. B*, 2002, **106**, 5814–5819.

- 5 Y. V. Nefedov, V. I. Gati, D. Dzhurinskii, B. F. Sergushin, N. P. Salyn, *Russ. J. Inorg. Chem.*, 1975, **20**, 1279–1283.
- 6 P. Kubelka, *J. Opt. Soc. Am.*, 1948, **38**, 448–457.
- 7 J. I. Pankove, *Optical processes in semiconductors*, Dover Publications, Inc., New York, 1971.
- 8 N. A. Tsvetkov, L. L. Larina, O. Shevaleevskiy, E. A. Al-Ammar and B. T. Ahn, *Prog. Photovoltaics Res. Appl.*, 2012, **20**, 904–911.
